# Supplementary material for: A Computational Approach to Analyze the Mechanism of Action of the Kinase Inhibitor Bafetinib
Source: PubMed Central journal article supplement (PMC2987840; doi:10.1371/journal.pcbi.1001001), 2010-11-18

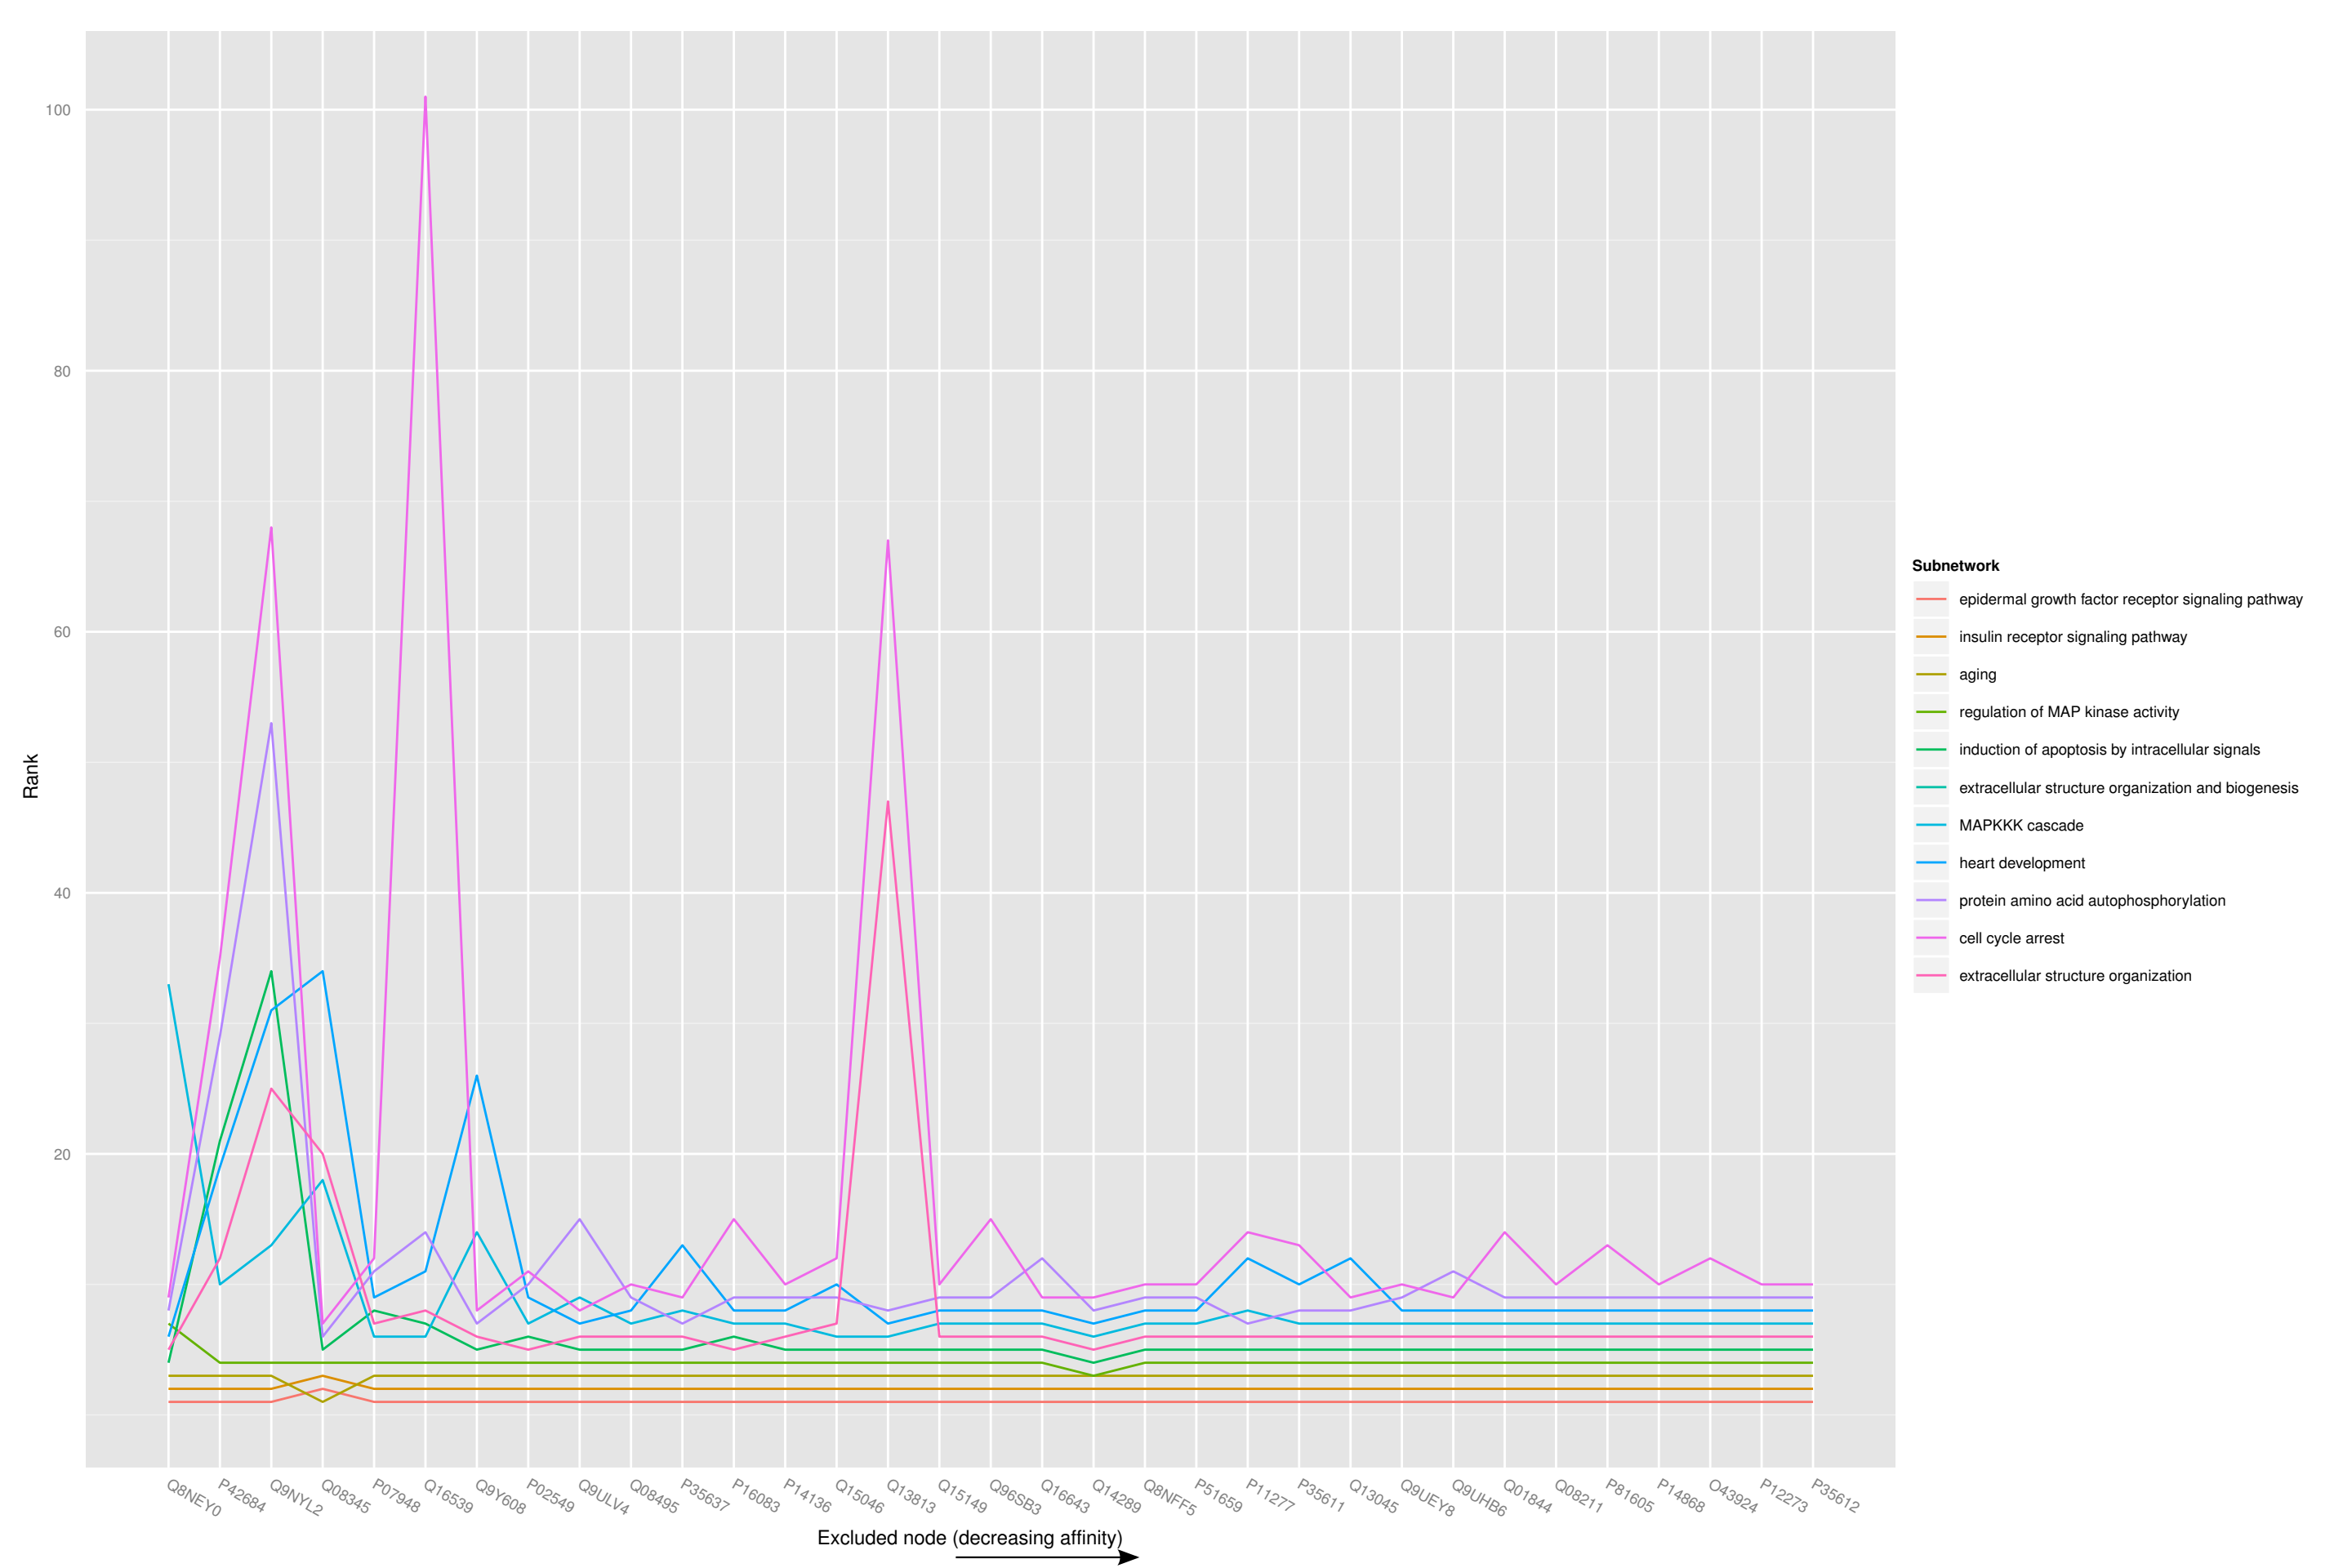

Supplement: pcbi.1001001.s003.pdf [file pcbi.1001001.s003.pdf]
