# Supplementary material for: A Computational Approach to Analyze the Mechanism of Action of the Kinase Inhibitor Bafetinib
Source: PLoS Comput Biol. 2010 Nov 18;6(11):e1001001. doi: 10.1371/journal.pcbi.1001001 (PMC2987840; doi:10.1371/journal.pcbi.1001001)
Supplement: Table S2 — Significantly hit sub-network by the highly promiscuous drug dasatinib. (0.12 MB XLS) [file pcbi.1001001.s005.xls]

## Sheet: dasa.HCC827.subnets
GOTerm	GOID	Subnetwork	Score	pValue
negative regulation of cellular component organization	GO:0051129	1	0.254144577394178	0
regulation of cell growth	GO:0001558	1	0.253482404121692	0
cell cycle arrest	GO:0007050	1	0.247584027004283	0
interphase of mitotic cell cycle	GO:0051329	1	0.247454943364995	0
interphase	GO:0051325	1	0.247077649911148	0
negative regulation of growth	GO:0045926	1	0.246263707896682	0
negative regulation of cell size	GO:0045792	1	0.244279914969218	0
induction of apoptosis by extracellular signals	GO:0008624	1	0.244167933137254	0
cell growth	GO:0016049	1	0.243658086092123	0
negative regulation of transport	GO:0051051	1	0.241800483600967	0
intracellular receptor-mediated signaling pathway	GO:0030522	1	0.240214371707817	0
regulation of cell size	GO:0008361	1	0.238838555239915	0
negative regulation of cell growth	GO:0030308	1	0.237712279971445	0
steroid hormone receptor signaling pathway	GO:0030518	1	0.235471954066968	0
cell projection assembly	GO:0030031	1	0.231204474505723	0
negative regulation of catalytic activity	GO:0043086	1	0.222446909131202	0
positive regulation of signal transduction	GO:0009967	1	0.22125490079158	0
endocytosis	GO:0006897	1	0.21986335112219	0
membrane invagination	GO:0010324	1	0.21986335112219	0
regulation of MAP kinase activity	GO:0043405	1	0.217869727768494	0
regulation of transport	GO:0051049	1	0.216946898176929	0
negative regulation of cell cycle	GO:0045786	1	0.214321353016173	0
cell projection organization	GO:0030030	1	0.2104222924447	0
cell part morphogenesis	GO:0032990	1	0.2104222924447	0
cell projection morphogenesis	GO:0048858	1	0.2104222924447	0
negative regulation of cell proliferation	GO:0008285	1	0.209732142857143	0
neuron projection morphogenesis	GO:0048812	1	0.209725871003932	0
peptidyl-tyrosine phosphorylation	GO:0018108	1	0.20958378866871	0
peptidyl-tyrosine modification	GO:0018212	1	0.20958378866871	0
protein folding	GO:0006457	1	0.209351887548886	0
stress-activated protein kinase signaling pathway	GO:0031098	1	0.209075864422823	0
axonogenesis	GO:0007409	1	0.209032756977121	0
G1/S transition of mitotic cell cycle	GO:0000082	1	0.208815671991422	0
androgen receptor signaling pathway	GO:0030521	1	0.207545217155554	0
ectoderm development	GO:0007398	1	0.207525711733227	0
regulation of myeloid cell differentiation	GO:0045637	1	0.20734880769894	0
exocytosis	GO:0006887	1	0.207114699393983	0
extracellular structure organization	GO:0043062	1	0.207072928362173	0
epidermis development	GO:0008544	1	0.206766318567461	0
receptor-mediated endocytosis	GO:0006898	1	0.206564329451241	0
transmembrane receptor protein serine/threonine kinase signaling pathway	GO:0007178	1	0.206460739699711	0
cell morphogenesis involved in neuron differentiation	GO:0048667	1	0.206325534745112	0
JNK cascade	GO:0007254	1	0.205093509656485	0
regulation of DNA metabolic process	GO:0051052	1	0.20474740231123	0
ossification	GO:0001503	1	0.204739503410636	0
biomineral formation	GO:0031214	1	0.204739503410636	0
bone remodeling	GO:0046849	1	0.204166731480825	0
translational elongation	GO:0006414	1	0.203957635101453	0
negative regulation of multicellular organismal process	GO:0051241	1	0.203923612260103	0
protein autoprocessing	GO:0016540	1	0.203533606754049	0
protein processing	GO:0016485	1	0.20347580581903	0
protein amino acid autophosphorylation	GO:0046777	1	0.203338395104778	0
GOID NOT FOUND	GO:0043284	1	0.202627870033279	0
transforming growth factor beta receptor signaling pathway	GO:0007179	1	0.202556288612299	0
regulation of anatomical structure morphogenesis	GO:0022603	1	0.202332886784186	0
myeloid leukocyte differentiation	GO:0002573	1	0.201993790784473	0
regulation of neurotransmitter levels	GO:0001505	1	0.201479106103427	0
anterior/posterior pattern formation	GO:0009952	1	0.20127098116456	0
regulation of phosphate metabolic process	GO:0019220	1	0.20080839953268	0
regulation of phosphorus metabolic process	GO:0051174	1	0.20080839953268	0
DNA-dependent DNA replication	GO:0006261	1	0.200793165362042	0
tissue remodeling	GO:0048771	1	0.200746672632586	0
aging	GO:0007568	1	0.200667598649748	0
peptidyl-amino acid modification	GO:0018193	1	0.200619005505331	0
response to extracellular stimulus	GO:0009991	1	0.200288226089463	0
monocarboxylic acid metabolic process	GO:0032787	1	0.200059483561891	0
heart development	GO:0007507	1	0.199997462575072	0
cell morphogenesis involved in differentiation	GO:0000904	1	0.199683497891623	0
regionalization	GO:0003002	1	0.199608349054566	0
GOID NOT FOUND	GO:0008632	1	0.199426383930366	0
cytoskeleton-dependent intracellular transport	GO:0030705	1	0.199105701740476	0
positive regulation of biosynthetic process	GO:0009891	1	0.199066272324258	0
interspecies interaction between organisms	GO:0044419	1	0.19905661316164	0
nuclear export	GO:0051168	1	0.198835459332676	0
mitochondrion organization	GO:0007005	1	0.198781759730955	0
positive regulation of cellular biosynthetic process	GO:0031328	1	0.198725165809385	0
positive regulation of transcription from RNA polymerase II promoter	GO:0045944	1	0.198658298965114	0
forebrain development	GO:0030900	1	0.198531366147595	0
activation of immune response	GO:0002253	1	0.19845171184819	0
regulation of DNA binding	GO:0051101	1	0.198389111887713	0
positive regulation of protein kinase activity	GO:0045860	1	0.198359099523069	0
regulation of transcription factor activity	GO:0051090	1	0.198142227659586	0
regulation of protein amino acid phosphorylation	GO:0001932	1	0.198127502464308	0
acute inflammatory response	GO:0002526	1	0.198079044551276	0
innate immune response	GO:0045087	1	0.197945903834266	0
tube morphogenesis	GO:0035239	1	0.197820741202503	0
ribonucleoprotein complex assembly	GO:0022618	1	0.197641868498829	0
regulation of protein modification process	GO:0031399	1	0.197250313199899	0
regulation of phosphorylation	GO:0042325	1	0.196789056089951	0
nucleocytoplasmic transport	GO:0006913	1	0.19658069203122	0
nuclear transport	GO:0051169	1	0.19658069203122	0
DNA recombination	GO:0006310	1	0.195979016239825	0
regulation of protein kinase activity	GO:0045859	1	0.195977096966092	0
chromatin assembly or disassembly	GO:0006333	1	0.195947614378546	0
protein import	GO:0017038	1	0.19593386427184	0
regulation of MAPKKK cascade	GO:0043408	1	0.195905224413294	0
positive regulation of immune response	GO:0050778	1	0.19589700807318	0
Golgi vesicle transport	GO:0048193	1	0.195874210485543	0
protein targeting	GO:0006605	1	0.195868050680386	0
response to bacterium	GO:0009617	1	0.195845097196232	0
response to nutrient levels	GO:0031667	1	0.195845097196232	0
regulation of cell adhesion	GO:0030155	1	0.195665449813841	0
in utero embryonic development	GO:0001701	1	0.195512677117303	0
regulation of defense response	GO:0031347	1	0.195455898980433	0
positive regulation of kinase activity	GO:0033674	1	0.195434394202555	0
positive regulation of protein modification process	GO:0031401	1	0.195053039805963	0
positive regulation of transferase activity	GO:0051347	1	0.195015309034624	0
negative regulation of cellular protein metabolic process	GO:0032269	1	0.194724604992741	0
extracellular matrix organization	GO:0030198	1	0.194648552660442	0
lymphocyte mediated immunity	GO:0002449	1	0.194591839663971	0
regulation of peptidase activity	GO:0052547	1	0.194479234726482	0
nuclear import	GO:0051170	1	0.194345024866049	0
neuron projection development	GO:0031175	1	0.194344940297378	0
DNA packaging	GO:0006323	1	0.194329507558294	0
induction of apoptosis	GO:0006917	1	0.194139285577966	0
induction of programmed cell death	GO:0012502	1	0.194139285577966	0
proteasomal protein catabolic process	GO:0010498	1	0.194060586916804	0
proteasomal ubiquitin-dependent protein catabolic process	GO:0043161	1	0.194060586916804	0
protein import into nucleus	GO:0006606	1	0.194051121396525	0
regulation of caspase activity	GO:0043281	1	0.193956253267924	0
regulation of endopeptidase activity	GO:0052548	1	0.193956253267924	0
regulation of binding	GO:0051098	1	0.193583074868295	0
cell-cell adhesion	GO:0016337	1	0.193539240404048	0
insulin receptor signaling pathway	GO:0008286	1	0.193523111806591	0
RNA localization	GO:0006403	1	0.193490003221233	0
nucleobase, nucleoside, nucleotide and nucleic acid transport	GO:0015931	1	0.193490003221233	0
negative regulation of cell differentiation	GO:0045596	1	0.193490003221233	0
nucleic acid transport	GO:0050657	1	0.193360670429606	0
RNA transport	GO:0050658	1	0.193360670429606	0
establishment of RNA localization	GO:0051236	1	0.193360670429606	0
regulation of ligase activity	GO:0051340	1	0.193286109349248	0
regulation of ubiquitin-protein ligase activity	GO:0051438	1	0.193286109349248	0
response to hypoxia	GO:0001666	1	0.193082435893664	0
transcription initiation	GO:0006352	1	0.192932898068942	0
cyclic-nucleotide-mediated signaling	GO:0019935	1	0.192932898068942	0
positive regulation of transport	GO:0051050	1	0.192932898068942	0
G-protein signaling, coupled to cyclic nucleotide second messenger	GO:0007187	1	0.192901052318571	0
negative regulation of signal transduction	GO:0009968	1	0.192812283113086	0
response to steroid hormone stimulus	GO:0048545	1	0.192783599604692	0
regulation of ubiquitin-protein ligase activity during mitotic cell cycle	GO:0051439	1	0.192731808256709	0
positive regulation of ligase activity	GO:0051351	1	0.192538646756845	0
positive regulation of ubiquitin-protein ligase activity	GO:0051443	1	0.192538646756845	0
Wnt receptor signaling pathway	GO:0016055	1	0.192534125573741	0
oxygen and reactive oxygen species metabolic process	GO:0006800	1	0.192380432231916	0
monovalent inorganic cation transport	GO:0015672	1	0.192297122918021	0
response to peptide hormone stimulus	GO:0043434	1	0.192128651820123	0
mRNA transport	GO:0051028	1	0.192116412882378	0
positive regulation of ubiquitin-protein ligase activity during mitotic cell cycle	GO:0051437	1	0.192076649261844	0
microtubule-based movement	GO:0007018	1	0.191993282660601	0
negative regulation of ligase activity	GO:0051352	1	0.191899109949237	0
negative regulation of ubiquitin-protein ligase activity	GO:0051444	1	0.191899109949237	0
regulation of immune response	GO:0050776	1	0.191872320629478	0
cellular calcium ion homeostasis	GO:0006874	1	0.191799162496139	0
negative regulation of protein metabolic process	GO:0051248	1	0.19172527381257	0
regulation of kinase activity	GO:0043549	1	0.191505468974339	0
MAPKKK cascade	GO:0000165	1	0.191308275638114	0
anaphase-promoting complex-dependent proteasomal ubiquitin-dependent protein catabolic process	GO:0031145	1	0.191178640525484	0
negative regulation of ubiquitin-protein ligase activity during mitotic cell cycle	GO:0051436	1	0.191178640525484	0
chemotaxis	GO:0006935	1	0.19101169152009	0
response to radiation	GO:0009314	1	0.19101169152009	0
taxis	GO:0042330	1	0.19101169152009	0
regulation of cytokine production	GO:0001817	1	0.190820092462499	0
cellular metal ion homeostasis	GO:0006875	1	0.190631628173647	0
transcription initiation from RNA polymerase II promoter	GO:0006367	1	0.190603957320627	0
protein-DNA complex assembly	GO:0065004	1	0.190593222119133	0
neuron apoptosis	GO:0051402	1	0.190566477241257	0
response to light stimulus	GO:0009416	1	0.190518835036182	0
muscle contraction	GO:0006936	1	0.19050745592179	0
calcium ion homeostasis	GO:0055074	1	0.190326553727377	0
cytokine production	GO:0001816	1	0.190194050524449	0
regulation of response to external stimulus	GO:0032101	1	0.190108701766915	0
protein ubiquitination	GO:0016567	1	0.190098351692265	0
inflammatory response	GO:0006954	1	0.190066076119012	0
adaptive immune response	GO:0002250	1	0.189434033340826	0
T cell proliferation	GO:0042098	1	0.189383653426968	0
steroid metabolic process	GO:0008202	1	0.189330614169917	0
positive regulation of phosphate metabolic process	GO:0045937	1	0.189085756615459	0
metal ion homeostasis	GO:0055065	1	0.189060105829316	0
adaptive immune response based on somatic recombination of immune receptors built from immunoglobulin superfamily domains	GO:0002460	1	0.188951796999087	0
cell division	GO:0051301	1	0.188834882017819	0
viral reproduction	GO:0016032	1	0.188720534156868	0
muscle system process	GO:0003012	1	0.188655640987457	0
transmembrane transport	GO:0055085	1	0.188571027169646	0
translational initiation	GO:0006413	1	0.188464495286254	0
regulation of DNA replication	GO:0006275	1	0.188307205087817	0
positive regulation of phosphorylation	GO:0042327	1	0.188194097347624	0
RNA splicing, via transesterification reactions with bulged adenosine as nucleophile	GO:0000377	1	0.188006344159987	0
nuclear mRNA splicing, via spliceosome	GO:0000398	1	0.188006344159987	0
regulation of transferase activity	GO:0051338	1	0.187970669837495	0
cellular di-, tri-valent inorganic cation homeostasis	GO:0030005	1	0.187387797539905	0
pattern specification process	GO:0007389	1	0.18736536966127	0
blood vessel development	GO:0001568	1	0.186970400683412	0
tube development	GO:0035295	1	0.186932638208063	0
RNA splicing, via transesterification reactions	GO:0000375	1	0.186813015309454	0
integrin-mediated signaling pathway	GO:0007229	1	0.186630097438634	0
anti-apoptosis	GO:0006916	1	0.186614372851395	0
vasculature development	GO:0001944	1	0.186576785839686	0
GOID NOT FOUND	GO:0045045	1	0.186195554350491	0
chromatin assembly	GO:0031497	1	0.186048283808225	0
viral reproductive process	GO:0022415	1	0.185913863512061	0
positive regulation of binding	GO:0051099	1	0.185760257937531	0
cellular cation homeostasis	GO:0030003	1	0.185278017862588	0
di-, tri-valent inorganic cation homeostasis	GO:0055066	1	0.18491751418603	0
nucleotide-excision repair	GO:0006289	1	0.184470413951075	0
protein modification by small protein conjugation	GO:0032446	1	0.184279847042666	0
neuron development	GO:0048666	1	0.184027535472061	0
positive regulation of response to stimulus	GO:0048584	1	0.183940557730497	0
response to molecule of bacterial origin	GO:0002237	1	0.183823355738874	0
G-protein signaling, coupled to cAMP nucleotide second messenger	GO:0007188	1	0.183632072330196	0
GOID NOT FOUND	GO:0006512	1	0.183442240709576	0
cAMP-mediated signaling	GO:0019933	1	0.183408862267436	0
immune response-regulating signaling pathway	GO:0002764	1	0.183045930550881	0
regulation of catabolic process	GO:0009894	1	0.182927343982438	0
positive regulation of DNA binding	GO:0043388	1	0.182927343982438	0
meiotic cell cycle	GO:0051321	1	0.182869091813626	0
humoral immune response	GO:0006959	1	0.182741970408663	0
skeletal system development	GO:0001501	1	0.182647018595444	0
RNA elongation	GO:0006354	1	0.182528979561693	0
lipid transport	GO:0006869	1	0.182528979561693	0
nucleotide biosynthetic process	GO:0009165	1	0.182525913702725	0
regulation of neuron apoptosis	GO:0043523	1	0.182525913702725	0
positive regulation of cytokine production	GO:0001819	1	0.182290849446819	0
meiosis	GO:0007126	1	0.181969232265337	0
M phase of meiotic cell cycle	GO:0051327	1	0.181969232265337	0
immune response-activating signal transduction	GO:0002757	1	0.181854803918837	0
cation homeostasis	GO:0055080	1	0.181588157992591	0
positive regulation of immune system process	GO:0002684	1	0.181581947763252	0
maintenance of location	GO:0051235	1	0.18105101211585	0
positive regulation of caspase activity	GO:0043280	1	0.179768285719324	0
energy derivation by oxidation of organic compounds	GO:0015980	1	0.17973839227801	0
RNA elongation from RNA polymerase II promoter	GO:0006368	1	0.179570077305265	0
regulation of peptidyl-tyrosine phosphorylation	GO:0050730	1	0.178847430718387	0
response to other organism	GO:0051707	1	0.178787874464402	0
epidermal growth factor receptor signaling pathway	GO:0007173	1	0.178237879299199	0
neurotransmitter secretion	GO:0007269	1	0.178237879299199	0
cell morphogenesis	GO:0000902	1	0.177894729435935	0
cellular component morphogenesis	GO:0032989	1	0.177894729435935	0
double-strand break repair	GO:0006302	1	0.177830652055015	0
organic acid metabolic process	GO:0006082	1	0.177611836835103	0
carboxylic acid metabolic process	GO:0019752	1	0.177611836835103	0
positive regulation of transcription factor activity	GO:0051091	1	0.177032947937281	0
regulation of T cell proliferation	GO:0042129	1	0.176927838502371	0
regulation of lipid metabolic process	GO:0019216	1	0.176759664596841	0
regulation of gene expression, epigenetic	GO:0040029	1	0.176649723318563	0
cofactor metabolic process	GO:0051186	1	0.176647068577897	0
response to lipopolysaccharide	GO:0032496	1	0.176524736812954	0
cellular membrane organization	GO:0016044	1	0.176447517244084	0
transmembrane receptor protein tyrosine kinase signaling pathway	GO:0007169	1	0.176336461594062	0
regulation of intracellular transport	GO:0032386	1	0.1760394332041	0
JAK-STAT cascade	GO:0007259	1	0.175750564054152	0
regulation of protein transport	GO:0051223	1	0.175242284689128	0
DNA replication	GO:0006260	1	0.174603278282754	0
response to hormone stimulus	GO:0009725	1	0.174290896905915	0
positive regulation of protein amino acid phosphorylation	GO:0001934	1	0.174261599161505	0
activation of caspase activity	GO:0006919	1	0.174261599161505	0
osteoblast differentiation	GO:0001649	1	0.174094692759711	0
embryonic development ending in birth or egg hatching	GO:0009792	1	0.173379607006898	0
chordate embryonic development	GO:0043009	1	0.173379607006898	0
positive regulation of DNA metabolic process	GO:0051054	1	0.172937477493322	0
BMP signaling pathway	GO:0030509	1	0.171998461510057	0
induction of apoptosis by intracellular signals	GO:0008629	1	0.171872823481197	0
negative regulation of biosynthetic process	GO:0009890	1	0.170449411226272	0
immunoglobulin mediated immune response	GO:0016064	1	0.170449411226272	0
B cell mediated immunity	GO:0019724	1	0.170449411226272	0
negative regulation of cellular biosynthetic process	GO:0031327	1	0.170449411226272	0
positive regulation of defense response	GO:0031349	1	0.170150544154991	0
positive regulation of transcription, DNA-dependent	GO:0045893	1	0.170116377165471	0
response to ionizing radiation	GO:0010212	1	0.169675767604624	0
positive regulation of RNA metabolic process	GO:0051254	1	0.169431819626955	0
striated muscle cell differentiation	GO:0051146	1	0.169334859620801	0
nucleosome assembly	GO:0006334	1	0.169297243889556	0
positive regulation of translation	GO:0045727	1	0.168131819520849	0
regulation of response to stimulus	GO:0048583	1	0.16800107197491	0
response to abiotic stimulus	GO:0009628	1	0.167719076404584	0
regulation of nucleocytoplasmic transport	GO:0046822	1	0.167684200846265	0
activation of plasma proteins involved in acute inflammatory response	GO:0002541	1	0.167098578384497	0
cellular membrane fusion	GO:0006944	1	0.167098578384497	0
complement activation	GO:0006956	1	0.167098578384497	0
cytokine-mediated signaling pathway	GO:0019221	1	0.167098578384497	0
RNA catabolic process	GO:0006401	1	0.166596026269055	0
positive regulation of growth	GO:0045927	1	0.166596026269055	0
production of molecular mediator of immune response	GO:0002440	1	0.166445089633702	0
post-Golgi vesicle-mediated transport	GO:0006892	1	0.166424437294454	0
positive regulation of apoptosis	GO:0043065	1	0.166272674774636	0
response to biotic stimulus	GO:0009607	1	0.166120189046711	0
positive regulation of programmed cell death	GO:0043068	1	0.16593795207043	0
positive regulation of MAPKKK cascade	GO:0043410	1	0.165628148120796	0
protein complex assembly	GO:0006461	1	0.165083140110954	0
cell cycle phase	GO:0022403	1	0.165009543150083	0
regulation of immune system process	GO:0002682	1	0.164917738337326	0
gene silencing	GO:0016458	1	0.164460179778426	0
epithelial cell proliferation	GO:0050673	1	0.164428753498601	0
cellular ion homeostasis	GO:0006873	1	0.164117820239307	0
cellular chemical homeostasis	GO:0055082	1	0.163737774154488	0
negative regulation of nucleobase, nucleoside, nucleotide and nucleic acid metabolic process	GO:0045934	1	0.163608048576324	0
negative regulation of cytoskeleton organization	GO:0051494	1	0.163504710324375	0
B cell differentiation	GO:0030183	1	0.163384785506482	0
regulation of inflammatory response	GO:0050727	1	0.163384785506482	0
coenzyme metabolic process	GO:0006732	1	0.163156824620302	0
regulation of intracellular protein transport	GO:0033157	1	0.162841175947858	0
cytokine biosynthetic process	GO:0042089	1	0.162811919827086	0
cytokine metabolic process	GO:0042107	1	0.162811919827086	0
response to temperature stimulus	GO:0009266	1	0.162293315141476	0
positive regulation of NF-kappaB transcription factor activity	GO:0051092	1	0.161706983317224	0
cellular aromatic compound metabolic process	GO:0006725	1	0.161696143143494	0
Notch signaling pathway	GO:0007219	1	0.161381272527955	0
one-carbon metabolic process	GO:0006730	1	0.160857776722356	0
respiratory tube development	GO:0030323	1	0.160857776722356	0
lung development	GO:0030324	1	0.160857776722356	0
ion homeostasis	GO:0050801	1	0.160731491782259	0
response to UV	GO:0009411	1	0.160518385760754	0
negative regulation of gene-specific transcription from RNA polymerase II promoter	GO:0010553	1	0.160518385760754	0
positive regulation of response to external stimulus	GO:0032103	1	0.160518385760754	0
multicellular organism growth	GO:0035264	1	0.159811638828731	0
regulation of epithelial cell proliferation	GO:0050678	1	0.159793504112778	0
sterol metabolic process	GO:0016125	1	0.159660059477766	0
response to ethanol	GO:0045471	1	0.159660059477766	0
ubiquitin-dependent protein catabolic process	GO:0006511	1	0.159000904640267	0
positive regulation of multicellular organismal process	GO:0051240	1	0.158745586828116	0
RNA export from nucleus	GO:0006405	1	0.158395188126739	0
fatty acid oxidation	GO:0019395	1	0.158395188126739	0
purine nucleotide metabolic process	GO:0006163	1	0.158192313713067	0
response to insulin stimulus	GO:0032868	1	0.157718263799625	0
cholesterol metabolic process	GO:0008203	1	0.157521695117493	0
regeneration	GO:0031099	1	0.157521695117493	0
gliogenesis	GO:0042063	1	0.157293719820018	0
cytoplasm organization	GO:0007028	1	0.15726711179739	0
regulation of protein catabolic process	GO:0042176	1	0.15726711179739	0
secretion by cell	GO:0032940	1	0.157233243328594	0
negative regulation of translation	GO:0017148	1	0.157058046911106	0
lipoprotein metabolic process	GO:0042157	1	0.157058046911106	0
negative regulation of apoptosis	GO:0043066	1	0.15699536265235	0
morphogenesis of a branching structure	GO:0001763	1	0.156764312062024	0
viral infectious cycle	GO:0019058	1	0.156287063583658	0
regulation of osteoblast differentiation	GO:0045667	1	0.156164207127002	0
detection of stimulus	GO:0051606	1	0.156164207127002	0
negative regulation of programmed cell death	GO:0043069	1	0.155981580737872	0
cartilage development	GO:0051216	1	0.155478796626871	0
ribonucleotide metabolic process	GO:0009259	1	0.15525094423794	0
protein homooligomerization	GO:0051260	1	0.154728411905374	0
regulation of cytokine biosynthetic process	GO:0042035	1	0.154394713576699	0
negative regulation of locomotion	GO:0040013	1	0.154283383281303	0
RNA splicing	GO:0008380	1	0.154265611639029	0
actin filament bundle assembly	GO:0051017	1	0.153645906280593	0
mRNA catabolic process	GO:0006402	1	0.153324342831823	0
nucleoside triphosphate metabolic process	GO:0009141	1	0.152656073969999	0
positive regulation of cell cycle	GO:0045787	1	0.152656073969999	0
organic acid biosynthetic process	GO:0016053	1	0.152373859547091	0
carboxylic acid biosynthetic process	GO:0046394	1	0.152373859547091	0
methylation	GO:0032259	1	0.152024874737477	0
macromolecule methylation	GO:0043414	1	0.152024874737477	0
peptidyl-serine modification	GO:0018209	1	0.15190021956123	0
branching morphogenesis of a tube	GO:0048754	1	0.151676086969304	0
regulation of fatty acid metabolic process	GO:0019217	1	0.15135864612885	0
regulation of tissue remodeling	GO:0034103	1	0.15135864612885	0
regulation of bone remodeling	GO:0046850	1	0.15135864612885	0
positive regulation of transcription	GO:0045941	1	0.150799132871956	0
cytoskeleton organization	GO:0007010	1	0.150709114168986	0
telomere maintenance	GO:0000723	1	0.150445076514849	0
telomere organization	GO:0032200	1	0.150445076514849	0
cellular homeostasis	GO:0019725	1	0.150388720546047	0
mRNA processing	GO:0006397	1	0.150035976792592	0
chemical homeostasis	GO:0048878	1	0.149992977585728	0
response to reactive oxygen species	GO:0000302	1	0.149927489437058	0
purine ribonucleotide metabolic process	GO:0009150	1	0.149927489437058	0
spliceosome assembly	GO:0000245	1	0.149706267658014	0
humoral immune response mediated by circulating immunoglobulin	GO:0002455	1	0.149706267658014	0
energy reserve metabolic process	GO:0006112	1	0.149706267658014	0
regulation of G-protein coupled receptor protein signaling pathway	GO:0008277	1	0.149662760077698	0
antigen processing and presentation of peptide antigen	GO:0048002	1	0.149539058945856	0
eye morphogenesis	GO:0048592	1	0.149480770161443	0
response to wounding	GO:0009611	1	0.149329722926718	0
negative regulation of cellular component movement	GO:0051271	1	0.148936384058449	0
protein depolymerization	GO:0051261	1	0.148773262449828	0
intracellular protein transport	GO:0006886	1	0.148153548905041	0
defense response	GO:0006952	1	0.147977793789364	0
regulation of translational initiation	GO:0006446	1	0.14795531715909	0
regulation of transforming growth factor beta receptor signaling pathway	GO:0017015	1	0.147848473444972	0
response to heat	GO:0009408	1	0.147058684591099	0
cellular component disassembly	GO:0022411	1	0.147058684591099	0
regulation of angiogenesis	GO:0045765	1	0.147058684591099	0
response to cytokine stimulus	GO:0034097	1	0.147002145304443	0
mitochondrial transport	GO:0006839	1	0.146997435659574	0
muscle cell proliferation	GO:0033002	1	0.146997435659574	0
antigen processing and presentation of peptide antigen via MHC class I	GO:0002474	1	0.146931935991837	0
fibroblast growth factor receptor signaling pathway	GO:0008543	1	0.146535408451567	0
regulation of JUN kinase activity	GO:0043506	1	0.146433300763951	0
translation	GO:0006412	1	0.146408206921415	0
positive regulation of T cell proliferation	GO:0042102	1	0.146161008813437	0
feeding behavior	GO:0007631	1	0.146058454118589	0
positive regulation of peptidyl-tyrosine phosphorylation	GO:0050731	1	0.14605790342426	0
peptidyl-serine phosphorylation	GO:0018105	1	0.145938088553988	0
positive regulation of nucleobase, nucleoside, nucleotide and nucleic acid metabolic process	GO:0045935	1	0.14501661658203	0
polysaccharide metabolic process	GO:0005976	1	0.144161047535633	0
T cell differentiation in the thymus	GO:0033077	1	0.144161047535633	0
cellular polysaccharide metabolic process	GO:0044264	1	0.144161047535633	0
ribonucleotide biosynthetic process	GO:0009260	1	0.144042788702638	0
defense response to bacterium	GO:0042742	1	0.144042788702638	0
regulation of innate immune response	GO:0045088	1	0.144042788702638	0
response to calcium ion	GO:0051592	1	0.14379210311809	0
learning	GO:0007612	1	0.143033920591764	0
ion transport	GO:0006811	1	0.142407398385222	0
cytokinesis	GO:0000910	1	0.142264728037586	0
regulation of anti-apoptosis	GO:0045767	1	0.142264728037586	0
regulation of multicellular organism growth	GO:0040014	1	0.142253529633177	0
regulation of JNK cascade	GO:0046328	1	0.142036568940371	0
immunoglobulin production	GO:0002377	1	0.141331021326797	0
mRNA metabolic process	GO:0016071	1	0.141178475068599	0
tissue homeostasis	GO:0001894	1	0.141176337207455	0
glycogen metabolic process	GO:0005977	1	0.141176337207455	0
cellular glucan metabolic process	GO:0006073	1	0.141176337207455	0
complement activation, classical pathway	GO:0006958	1	0.141176337207455	0
multicellular organismal homeostasis	GO:0048871	1	0.141176337207455	0
fatty acid biosynthetic process	GO:0006633	1	0.141050641445964	0
purine nucleotide biosynthetic process	GO:0006164	1	0.140872542507092	0
purine nucleoside triphosphate metabolic process	GO:0009144	1	0.140872542507092	0
ribonucleoside triphosphate metabolic process	GO:0009199	1	0.140872542507092	0
telencephalon development	GO:0021537	1	0.140872542507092	0
regulation of coagulation	GO:0050818	1	0.140872542507092	0
enzyme linked receptor protein signaling pathway	GO:0007167	1	0.14040380381584	0
detection of external stimulus	GO:0009581	1	0.140215587287289	0
neural tube development	GO:0021915	1	0.140076039913931	0
secretion	GO:0046903	1	0.139864392870353	0
establishment or maintenance of cell polarity	GO:0007163	1	0.139857334864239	0
negative regulation of cell migration	GO:0030336	1	0.139857334864239	0
vesicle-mediated transport	GO:0016192	1	0.139545260775853	0
glial cell differentiation	GO:0010001	1	0.139350012975998	0
nucleus organization	GO:0006997	1	0.138041005840028	0
DNA damage response, signal transduction resulting in induction of apoptosis	GO:0008630	1	0.137540272547738	0
purine ribonucleotide biosynthetic process	GO:0009152	1	0.137540272547738	0
purine ribonucleoside triphosphate metabolic process	GO:0009205	1	0.137540272547738	0
regulation of blood coagulation	GO:0030193	1	0.137540272547738	0
response to hydrogen peroxide	GO:0042542	1	0.137540272547738	0
positive regulation of innate immune response	GO:0045089	1	0.137540272547738	0
regulation of myeloid leukocyte differentiation	GO:0002761	1	0.137474968536108	0
regulation of ossification	GO:0030278	1	0.13707417390044	0
positive regulation of JUN kinase activity	GO:0043507	1	0.136648845608941	0
positive regulation of cell adhesion	GO:0045785	1	0.136520644740855	0
spliceosomal snRNP assembly	GO:0000387	1	0.136118378567855	0
heterocycle metabolic process	GO:0046483	1	0.136118378567855	0
membrane protein proteolysis	GO:0033619	1	0.135173531385715	0
liver development	GO:0001889	1	0.13474764935461	0
transcription from RNA polymerase III promoter	GO:0006383	1	0.13474764935461	0
synaptic vesicle transport	GO:0048489	1	0.13474764935461	0
ER-nuclear signaling pathway	GO:0006984	1	0.134037863559595	0
circadian rhythm	GO:0007623	1	0.134037863559595	0
regulation of fatty acid oxidation	GO:0046320	1	0.133776581174489	0
dendrite development	GO:0016358	1	0.133145029054866	0
response to toxin	GO:0009636	1	0.133015921477089	0
nuclear-transcribed mRNA catabolic process, nonsense-mediated decay	GO:0000184	1	0.132817211978066	0
positive regulation of anti-apoptosis	GO:0045768	1	0.132817211978066	0
pyruvate metabolic process	GO:0006090	1	0.132047023026034	0
positive regulation of cytokine biosynthetic process	GO:0042108	1	0.131869421377331	0
nucleotide-excision repair, DNA damage removal	GO:0000718	1	0.131288441977387	0
sodium ion transport	GO:0006814	1	0.131288441977387	0
neurotransmitter transport	GO:0006836	1	0.131288441977387	0
acute-phase response	GO:0006953	1	0.131288441977387	0
cellular response to hormone stimulus	GO:0032870	1	0.131288441977387	0
cell cycle process	GO:0022402	1	0.131076606317217	0
macromolecule biosynthetic process	GO:0009059	1	0.131046977835039	0
protein polyubiquitination	GO:0000209	1	0.131012602224603	0
interleukin-6 production	GO:0032635	1	0.131012602224603	0
negative regulation of cellular metabolic process	GO:0031324	1	0.13074285547791	0
nucleoside triphosphate biosynthetic process	GO:0009142	1	0.130356728723412	0
calcium-mediated signaling	GO:0019722	1	0.130356728723412	0
regulation of chromosome organization	GO:0033044	1	0.130356728723412	0
mRNA export from nucleus	GO:0006406	1	0.130315160888997	0
gene silencing by RNA	GO:0031047	1	0.130315160888997	0
response to estradiol stimulus	GO:0032355	1	0.130315160888997	0
morphogenesis of embryonic epithelium	GO:0016331	1	0.130030836901603	0
meiosis I	GO:0007127	1	0.129354214854671	0
activation of pro-apoptotic gene products	GO:0008633	1	0.12933478062768	0
regulation of protein import into nucleus	GO:0042306	1	0.12933478062768	0
negative regulation of metabolic process	GO:0009892	1	0.128066306385645	0
nitric oxide metabolic process	GO:0046209	1	0.127861674804482	0
somatic diversification of immune receptors	GO:0002200	1	0.127655108151996	0
somatic diversification of immune receptors via germline recombination within a single locus	GO:0002562	1	0.127655108151996	0
somatic cell DNA recombination	GO:0016444	1	0.127655108151996	0
regulation of protein binding	GO:0043393	1	0.127655108151996	0
membrane lipid biosynthetic process	GO:0046467	1	0.127655108151996	0
fibroblast proliferation	GO:0048144	1	0.127655108151996	0
regulation of fibroblast proliferation	GO:0048145	1	0.127655108151996	0
positive regulation of developmental process	GO:0051094	1	0.127072372447037	0
protein export from nucleus	GO:0006611	1	0.126879331848215	0
bone mineralization	GO:0030282	1	0.12668182997818	0
striated muscle contraction	GO:0006941	1	0.126487777602122	0
ribonucleoside triphosphate biosynthetic process	GO:0009201	1	0.126487777602122	0
negative regulation of coagulation	GO:0050819	1	0.126487777602122	0
G-protein coupled receptor protein signaling pathway	GO:0007186	1	0.125927851385953	0
regulation of cell-cell adhesion	GO:0022407	1	0.125721491024636	0
positive regulation of myeloid cell differentiation	GO:0045639	1	0.125636200641251	0
positive regulation of cell size	GO:0045793	1	0.125468351396284	0
vitamin metabolic process	GO:0006766	1	0.125097179708874	0
smooth muscle cell proliferation	GO:0048659	1	0.125097179708874	0
carbohydrate homeostasis	GO:0033500	1	0.12422224667156	0
glucose homeostasis	GO:0042593	1	0.12422224667156	0
membrane protein ectodomain proteolysis	GO:0006509	1	0.123838892287241	0
inhibition of adenylate cyclase activity by G-protein signaling pathway	GO:0007193	1	0.123838892287241	0
amine transport	GO:0015837	1	0.123838892287241	0
positive regulation of inflammatory response	GO:0050729	1	0.123838892287241	0
negative regulation of developmental process	GO:0051093	1	0.123740080987926	0
nitric oxide biosynthetic process	GO:0006809	1	0.123456673483886	0
detection of abiotic stimulus	GO:0009582	1	0.122868041596296	0
response to hexose stimulus	GO:0009746	1	0.122868041596296	0
response to glucose stimulus	GO:0009749	1	0.122868041596296	0
dorsal/ventral pattern formation	GO:0009953	1	0.122868041596296	0
regulation of protein ubiquitination	GO:0031396	1	0.122868041596296	0
positive regulation of tissue remodeling	GO:0034105	1	0.122868041596296	0
response to monosaccharide stimulus	GO:0034284	1	0.122868041596296	0
negative regulation of MAP kinase activity	GO:0043407	1	0.122868041596296	0
symbiosis, encompassing mutualism through parasitism	GO:0044403	1	0.122868041596296	0
positive regulation of bone remodeling	GO:0046852	1	0.122868041596296	0
protein kinase cascade	GO:0007243	1	0.122567311844661	0
purine nucleoside triphosphate biosynthetic process	GO:0009145	1	0.122421381553464	0
purine ribonucleoside triphosphate biosynthetic process	GO:0009206	1	0.122421381553464	0
pallium development	GO:0021543	1	0.122421381553464	0
negative regulation of blood coagulation	GO:0030195	1	0.122421381553464	0
RNA processing	GO:0006396	1	0.121739206058806	0
activation of JUN kinase activity	GO:0007257	1	0.12153610296785	0
tyrosine phosphorylation of STAT protein	GO:0007260	1	0.121407243598713	0
protein kinase B signaling cascade	GO:0043491	1	0.121407243598713	0
regulation of JAK-STAT cascade	GO:0046425	1	0.121407243598713	0
regulation of smooth muscle cell proliferation	GO:0048660	1	0.120758248426455	0
protein import into nucleus, translocation	GO:0000060	1	0.119830526149379	0
tRNA processing	GO:0008033	1	0.119830526149379	0
somatic diversification of immunoglobulins	GO:0016445	1	0.119830526149379	0
somatic recombination of immunoglobulin gene segments	GO:0016447	1	0.119830526149379	0
response to vitamin	GO:0033273	1	0.119830526149379	0
interleukin-2 production	GO:0032623	1	0.119424713021143	0
release of cytochrome c from mitochondria	GO:0001836	1	0.118864753954374	0
actin filament depolymerization	GO:0030042	1	0.118864753954374	0
regulation of bone mineralization	GO:0030500	1	0.118864753954374	0
regulation of actin filament depolymerization	GO:0030834	1	0.118864753954374	0
positive regulation of ossification	GO:0045778	1	0.118864753954374	0
detection of stimulus involved in sensory perception	GO:0050906	1	0.118864753954374	0
interaction with host	GO:0051701	1	0.118864753954374	0
neural plate development	GO:0001840	1	0.118455737122454	0
mismatch repair	GO:0006298	1	0.118147336391715	0
maintenance of fidelity during DNA-dependent DNA replication	GO:0045005	1	0.118147336391715	0
protein amino acid methylation	GO:0006479	1	0.117913007793028	0
protein amino acid alkylation	GO:0008213	1	0.117913007793028	0
positive regulation of cell growth	GO:0030307	1	0.117141512027401	0
regulation of transcription from RNA polymerase II promoter	GO:0006357	1	0.116797095260234	0
myoblast development	GO:0048627	1	0.116194516220128	0
myoblast maturation	GO:0048628	1	0.116194516220128	0
regulation of protein metabolic process	GO:0051246	1	0.115848869105604	0
lymphocyte homeostasis	GO:0002260	1	0.115620193689383	0
protein amino acid deacetylation	GO:0006476	1	0.115620193689383	0
peroxisome organization	GO:0007031	1	0.115620193689383	0
phospholipid biosynthetic process	GO:0008654	1	0.115620193689383	0
microtubule organizing center organization	GO:0031023	1	0.115620193689383	0
positive regulation of fibroblast proliferation	GO:0048146	1	0.115620193689383	0
response to cAMP	GO:0051591	1	0.115620193689383	0
DNA metabolic process	GO:0006259	1	0.114795114357576	0
embryonic epithelial tube formation	GO:0001838	1	0.114217728346522	0
macromolecular complex assembly	GO:0065003	1	0.11402439772685	0
reciprocal meiotic recombination	GO:0007131	1	0.113719093610029	0
regulation of action potential	GO:0001508	1	0.113654822048428	0
regulation of insulin receptor signaling pathway	GO:0046626	1	0.113654822048428	0
regulation of tyrosine phosphorylation of STAT protein	GO:0042509	1	0.112660617983431	0
regulation of transcription factor import into nucleus	GO:0042990	1	0.112660617983431	0
transcription factor import into nucleus	GO:0042991	1	0.112660617983431	0
response to external stimulus	GO:0009605	1	0.111805489993806	0
regulation of nitrogen compound metabolic process	GO:0051171	1	0.111798999981537	0
regulation of cell-matrix adhesion	GO:0001952	1	0.111682663873336	0
DNA replication initiation	GO:0006270	1	0.111197493074555	0
nucleotide-excision repair, DNA gap filling	GO:0006297	1	0.111197493074555	0
germ cell development	GO:0007281	1	0.111197493074555	0
male gonad development	GO:0008584	1	0.111197493074555	0
response to gamma radiation	GO:0010332	1	0.111197493074555	0
histone deacetylation	GO:0016575	1	0.111197493074555	0
platelet activation	GO:0030168	1	0.111197493074555	0
leukocyte chemotaxis	GO:0030595	1	0.111197493074555	0
regulation of multicellular organismal process	GO:0051239	1	0.110519329962272	0
regulation of apoptosis	GO:0042981	1	0.110447385003151	0
regulation of epidermal growth factor receptor signaling pathway	GO:0042058	1	0.110379822011935	0
positive regulation of DNA replication	GO:0045740	1	0.110379822011935	0
negative regulation of actin filament depolymerization	GO:0030835	1	0.110250834849319	0
positive regulation of protein transport	GO:0051222	1	0.110250834849319	0
neural plate morphogenesis	GO:0001839	1	0.109774087346031	0
neural tube formation	GO:0001841	1	0.109774087346031	0
regulation of programmed cell death	GO:0043067	1	0.109450421873617	0
positive regulation of smooth muscle cell proliferation	GO:0048661	1	0.10893235895637	0
maintenance of location in cell	GO:0051651	1	0.10893235895637	0
cell-cell junction organization	GO:0045216	1	0.108401911254206	0
S phase	GO:0051320	1	0.107999992003211	0
camera-type eye morphogenesis	GO:0048593	1	0.107650760404332	0
regulation of actin filament bundle assembly	GO:0032231	1	0.106991008961537	0
negative regulation of mitotic cell cycle	GO:0045930	1	0.106930294218296	0
transition metal ion transport	GO:0000041	1	0.106551395670401	0
fatty acid beta-oxidation	GO:0006635	1	0.106551395670401	0
retrograde vesicle-mediated transport, Golgi to ER	GO:0006890	1	0.106551395670401	0
cell structure disassembly during apoptosis	GO:0006921	1	0.106551395670401	0
histone ubiquitination	GO:0016574	1	0.106551395670401	0
regulation of exocytosis	GO:0017157	1	0.106551395670401	0
negative regulation of defense response	GO:0031348	1	0.106551395670401	0
centrosome organization	GO:0051297	1	0.106551395670401	0
defense response to virus	GO:0051607	1	0.106551395670401	0
double-strand break repair via homologous recombination	GO:0000724	1	0.105619329359466	0
recombinational repair	GO:0000725	1	0.105619329359466	0
post-embryonic development	GO:0009791	1	0.105619329359466	0
membrane docking	GO:0022406	1	0.105619329359466	0
positive regulation of bone mineralization	GO:0030501	1	0.105619329359466	0
positive regulation of intracellular transport	GO:0032388	1	0.105619329359466	0
regulation of receptor activity	GO:0010469	1	0.105297809355765	0
DNA modification	GO:0006304	1	0.104702497381252	0
catecholamine metabolic process	GO:0006584	1	0.104702497381252	0
phenol metabolic process	GO:0018958	1	0.104702497381252	0
cellular component assembly	GO:0022607	1	0.104210088646752	0
immune response	GO:0006955	1	0.104029617685379	0
protein amino acid phosphorylation	GO:0006468	1	0.104022671007443	0
maintenance of protein location	GO:0045185	1	0.103967760852185	0
regulation of oxidoreductase activity	GO:0051341	1	0.103394423995905	0
peptide cross-linking	GO:0018149	1	0.102220364226884	0
blood vessel endothelial cell migration	GO:0043534	1	0.102065021115858	0
modification-dependent protein catabolic process	GO:0019941	1	0.101674419842453	0
modification-dependent macromolecule catabolic process	GO:0043632	1	0.101674419842453	0
senescence	GO:0010149	1	0.101670201692612	0
apoptotic nuclear changes	GO:0030262	1	0.101670201692612	0
cellular response to insulin stimulus	GO:0032869	1	0.101670201692612	0
regulation of microtubule-based process	GO:0032886	1	0.101670201692612	0
peroxisomal transport	GO:0043574	1	0.101670201692612	0
glycerophospholipid biosynthetic process	GO:0046474	1	0.101670201692612	0
negative regulation of insulin receptor signaling pathway	GO:0046627	1	0.101670201692612	0
negative regulation of T cell activation	GO:0050868	1	0.101670201692612	0
actomyosin structure organization	GO:0031032	1	0.101031200934564	0
cellular protein catabolic process	GO:0044257	1	0.100891542301445	0
proteolysis involved in cellular protein catabolic process	GO:0051603	1	0.100891542301445	0
regulation of cell projection organization	GO:0031344	1	0.100756495204116	0
positive regulation of cell projection organization	GO:0031346	1	0.100756495204116	0
stress fiber assembly	GO:0043149	1	0.100756495204116	0
regulation of survival gene product expression	GO:0045884	1	0.100756495204116	0
positive regulation of nucleocytoplasmic transport	GO:0046824	1	0.100756495204116	0
actin filament capping	GO:0051693	1	0.100756495204116	0
lamellipodium assembly	GO:0030032	1	0.100723140495868	0
S phase of mitotic cell cycle	GO:0000084	1	0.10047838382815	0
primary neural tube formation	GO:0014020	1	0.100228031681199	0
cell activation during immune response	GO:0002263	1	0.0998582750307681	0
leukocyte activation during immune response	GO:0002366	1	0.0998582750307681	0
anion transport	GO:0006820	1	0.0998582750307681	0
RNA 3'-end processing	GO:0031123	1	0.0998582750307681	0
mRNA 3'-end processing	GO:0031124	1	0.0998582750307681	0
intracellular transport	GO:0046907	1	0.0995069781058472	0
cellular biosynthetic process	GO:0044249	1	0.0994307376317753	0
cellular localization	GO:0051641	1	0.0991362296552608	0
regulation of adaptive immune response	GO:0002819	1	0.0989751812851838	0
phosphoinositide 3-kinase cascade	GO:0014065	1	0.0989751812851838	0
activation of innate immune response	GO:0002218	1	0.0987480836613785	0
pattern recognition receptor signaling pathway	GO:0002221	1	0.0987480836613785	0
toll-like receptor signaling pathway	GO:0002224	1	0.0987480836613785	0
innate immune response-activating signal transduction	GO:0002758	1	0.0987480836613785	0
protein targeting to mitochondrion	GO:0006626	1	0.0987480836613785	0
superoxide metabolic process	GO:0006801	1	0.0987480836613785	0
cell-substrate junction assembly	GO:0007044	1	0.0987480836613785	0
viral genome replication	GO:0019079	1	0.0987480836613785	0
negative regulation of NF-kappaB transcription factor activity	GO:0032088	1	0.0987480836613785	0
maintenance of protein location in cell	GO:0032507	1	0.0987480836613785	0
regulation of homeostatic process	GO:0032844	1	0.0987480836613785	0
fibrinolysis	GO:0042730	1	0.0987480836613785	0
protein amino acid acylation	GO:0043543	1	0.0987480836613785	0
negative regulation of hydrolase activity	GO:0051346	1	0.0987480836613785	0
protein transport	GO:0015031	1	0.0980824192030246	0
response to amine stimulus	GO:0014075	1	0.0978117750122526	0
response to dsRNA	GO:0043331	1	0.0978117750122526	0
cell cycle	GO:0007049	1	0.0975461689221981	0
protein catabolic process	GO:0030163	1	0.0971440290263436	0
transcription from RNA polymerase II promoter	GO:0006366	1	0.0967412753626895	0
protein targeting to peroxisome	GO:0006625	1	0.0965414922198857	0
ER to Golgi vesicle-mediated transport	GO:0006888	1	0.0965414922198857	0
induction of apoptosis via death domain receptors	GO:0008625	1	0.0965414922198857	0
histone methylation	GO:0016571	1	0.0965414922198857	0
endoplasmic reticulum unfolded protein response	GO:0030968	1	0.0965414922198857	0
response to progesterone stimulus	GO:0032570	1	0.0965414922198857	0
regulation of generation of precursor metabolites and energy	GO:0043467	1	0.0965414922198857	0
negative regulation of gene expression, epigenetic	GO:0045814	1	0.0965414922198857	0
positive regulation of lipid metabolic process	GO:0045834	1	0.0965414922198857	0
cofactor biosynthetic process	GO:0051188	1	0.0965414922198857	0
response to mineralocorticoid stimulus	GO:0051385	1	0.0965414922198857	0
neural tube closure	GO:0001843	1	0.0959897222399142	0
tyrosine phosphorylation of Stat3 protein	GO:0042503	1	0.0956502555397596	0
insulin-like growth factor receptor signaling pathway	GO:0048009	1	0.0956502555397596	0
